# Supplementary material for: SncRNA (microRNA & snoRNA) opposite expression pattern found in multiple sclerosis relapse and remission is sex dependent
Source: PubMed Central journal article supplement (PMC4735588; doi:10.1038/srep20126), 2016-02-01
Supplement: srep20126-s1.pdf [file srep20126-s1.pdf]

## Supplementary information

### SncRNA (microRNA & snoRNA) opposite expression pattern found in multiple sclerosis relapse and remission is sex dependent

Muñoz-Culla Maider<sup>1-2</sup>, Irizar Haritz<sup>1-2-3</sup>, Sáenz-Cuesta Matías<sup>1-2</sup>, Castillo-Triviño Tamara<sup>1-2-4</sup>, Osorio-Querejeta Iñaki<sup>1-2</sup>, Sepúlveda Lucía<sup>1-2</sup>, López de Munain Adolfo<sup>1-4-5-6</sup>, Olascoaga Javier<sup>1-2-4</sup>, Otaegui David<sup>1-2</sup>

<sup>1</sup> Biodonostia Institute, Neuroscience Area, Multiple Sclerosis Group, San Sebastian, Spain

<sup>2</sup> Spanish network on Multiple Sclerosis (Red española de esclerosis múltiple –REEM–)

<sup>3</sup> Institute for Genomics and Multiscale Biology, Department of Genetics and Genomics Sciences, Icahn School of Medicine at Mount Sinai, New York, NY, USA.

<sup>4</sup> Hospital Universitario Donostia, Neurology Department, San Sebastian, Spain.

<sup>4</sup> University of the Basque Country (UPV-EHU), Department of Neuroscience, San Sebastian, Spain.

<sup>6</sup> Centro de Investigación Biomédica en red Enfermedades Neurodegenerativas (CIBERNED)

## SUPPLEMENTARY FIGURE LEGENDS

Supplementary figure 1. Relative expression of miRNA selected for technical validation. Results of qPCR experiments are shown for seven miRNA that were differentially expressed in relapse vs remission (top panel) and seven miRNA that were altered in remission vs control (bottom panel). \* $p < 0.05$ . \*\* $p < 0.01$

Supplementary figure 2. Male remission network. Built with miRNA altered in remission vs controls in male samples and their target miRNA as predicted by miRDIP. Node colors show fold change according to the color scale bar. TF: transcription factor. Gene: non-transcription factor gene.

## Relapse vs Remission

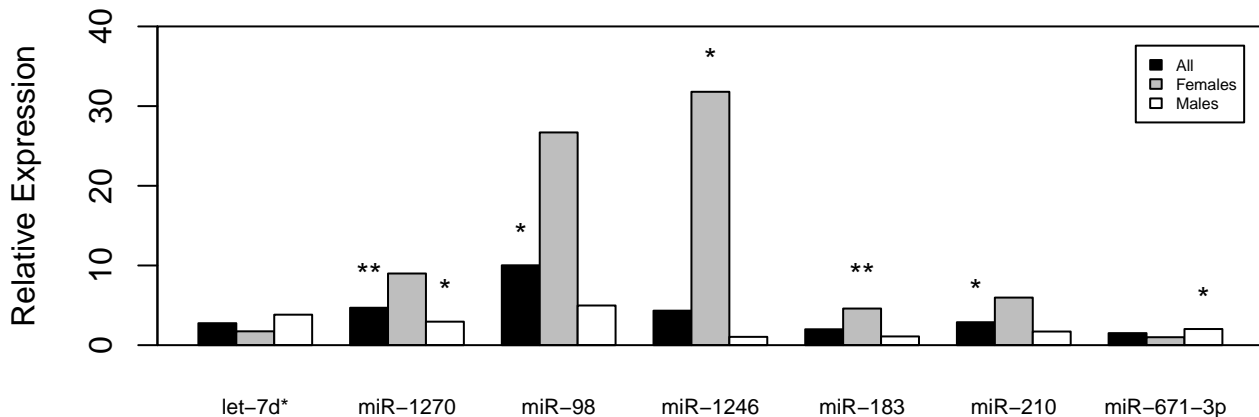

## Remission vs healthy controls

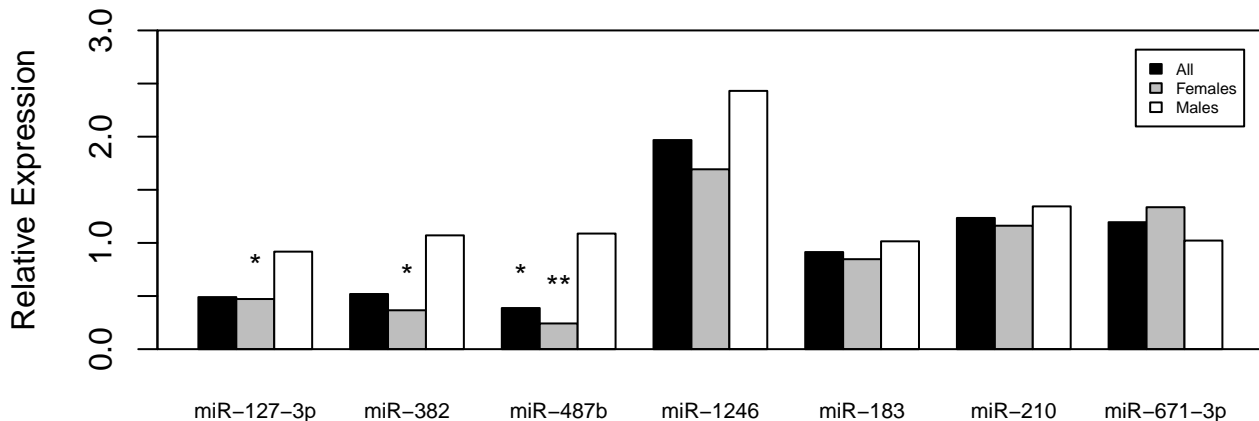

# Remission vs Controls Males

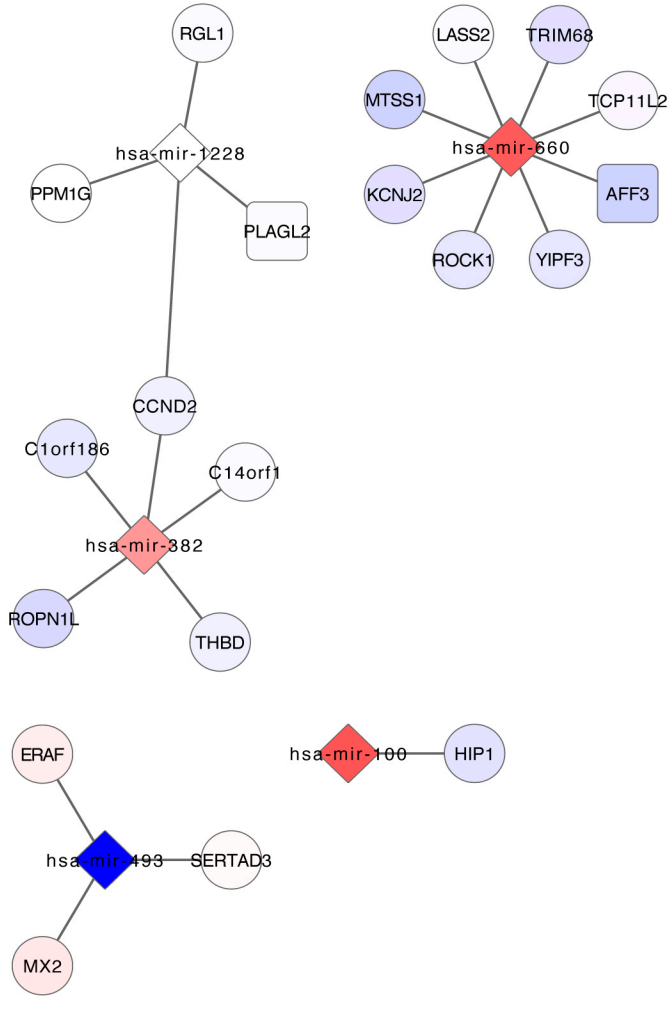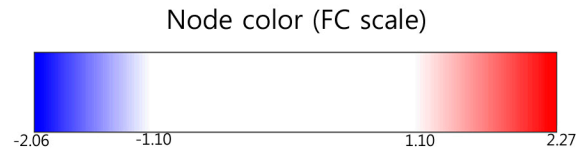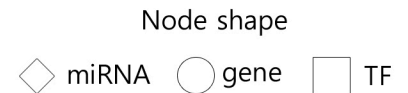

Supplementary table 1. The list of sncRNA which show a differential expression between relapse and remission phases in each group are shown, after applying the Rank Product algorithm. The fold-change (FC), p-value and false discovery rate values are shown.

| RELAPSE VS REMISSION |       |          |       |                 |       |          |       |
|----------------------|-------|----------|-------|-----------------|-------|----------|-------|
| <i>All</i>           |       |          |       | <i>Females</i>  |       |          |       |
| sncRNA               | FC    | p-value  | FDR   | sncRNA          | FC    | p-value  | FDR   |
| ACA40                | 2.53  | 8.98E-08 | 0.000 | ACA40           | 9.21  | 0.00E+00 | 0.000 |
| hsa-miR-1246         | 2.14  | 6.11E-06 | 0.003 | hsa-miR-1246    | 6.83  | 0.00E+00 | 0.000 |
| hsa-miR-1270         | 2.06  | 3.14E-05 | 0.007 | hsa-miR-210     | 6.55  | 0.00E+00 | 0.000 |
| ACA18                | 1.99  | 2.06E-04 | 0.018 | hsa-miR-1270    | 5.08  | 0.00E+00 | 0.000 |
| ACA24                | 1.91  | 6.86E-04 | 0.038 | hsa-miR-183     | 4.96  | 8.98E-06 | 0.002 |
| U70                  | 1.83  | 1.87E-04 | 0.019 | hsa-miR-18b     | 4.49  | 9.88E-05 | 0.016 |
| hsa-miR-19a          | 1.77  | 2.21E-04 | 0.015 | hsa-miR-98      | 3.70  | 1.17E-04 | 0.016 |
| hsa-miR-335          | 1.77  | 2.78E-04 | 0.018 | hsa-miR-331-5p  | 3.53  | 2.79E-04 | 0.028 |
| hsa-miR-210          | 1.77  | 8.98E-06 | 0.003 | hsa-miR-30e     | 3.51  | 4.58E-04 | 0.036 |
| hsa-miR-18b          | 1.76  | 3.15E-05 | 0.006 | hsa-miR-26b     | 3.46  | 1.80E-04 | 0.022 |
| hsa-miR-18a          | 1.68  | 5.54E-04 | 0.034 | U70             | 3.31  | 2.34E-04 | 0.026 |
| hsa-miR-326          | 1.67  | 1.52E-04 | 0.017 | hsa-miR-1224-5p | 3.10  | 2.96E-04 | 0.025 |
| hsa-miR-1224-5p      | 1.67  | 2.16E-04 | 0.017 | ACA15           | 3.06  | 2.88E-04 | 0.027 |
| hsa-miR-199a-3p      | 1.64  | 1.50E-04 | 0.019 | hsa-miR-933     | 2.87  | 5.66E-04 | 0.042 |
| hsa-miR-183          | 1.51  | 2.00E-04 | 0.019 | hsa-miR-326     | 2.84  | 6.92E-04 | 0.048 |
| hsa-miR-30e          | 1.49  | 1.62E-05 | 0.005 | hsa-miR-1825    | -1.63 | 2.43E-04 | 0.034 |
| hsa-miR-17-star      | 1.45  | 6.73E-04 | 0.039 | hsa-miR-504     | -2.01 | 6.92E-04 | 0.041 |
| hsa-miR-24-2-star    | 1.35  | 2.19E-04 | 0.016 | hsa-miR-1280    | -2.12 | 6.92E-04 | 0.041 |
| hsa-miR-1202         | 1.33  | 7.63E-05 | 0.011 | U81             | -2.26 | 2.61E-04 | 0.029 |
| hsa-miR-1825         | -1.25 | 5.72E-05 | 0.016 | SNORD4B         | -2.31 | 8.63E-04 | 0.046 |
| hsa-miR-671-3p       | -1.72 | 1.35E-06 | 0.001 | SNORD68         | -2.33 | 9.70E-04 | 0.047 |
| hsa-miR-455-3p       | -1.77 | 5.12E-06 | 0.002 | U57             | -2.34 | 5.66E-04 | 0.042 |
| hsa-let-7d-star      | -1.84 | 3.59E-07 | 0.000 | U78             | -2.35 | 5.39E-04 | 0.043 |
|                      |       |          |       | SNORD116-6      | -2.36 | 5.66E-04 | 0.042 |
|                      |       |          |       | hsa-miR-663     | -2.38 | 9.16E-04 | 0.046 |
|                      |       |          |       | U76             | -2.40 | 5.39E-04 | 0.043 |
|                      |       |          |       | U55             | -2.41 | 8.36E-04 | 0.047 |
|                      |       |          |       | hsa-miR-197     | -2.50 | 5.21E-04 | 0.048 |
|                      |       |          |       | hsa-miR-125a-5p | -2.52 | 6.47E-04 | 0.042 |
|                      |       |          |       | hsa-miR-935     | -2.54 | 3.32E-04 | 0.034 |
|                      |       |          |       | U25             | -2.55 | 2.34E-04 | 0.043 |
|                      |       |          |       | U44             | -2.56 | 2.43E-04 | 0.034 |
|                      |       |          |       | hsa-miR-193a-5p | -2.71 | 2.43E-04 | 0.034 |
|                      |       |          |       | hsa-miR-337-3p  | -2.74 | 1.80E-04 | 0.040 |
|                      |       |          |       | hsa-miR-766     | -2.88 | 9.88E-05 | 0.028 |
|                      |       |          |       | hsa-miR-455-3p  | -3.13 | 8.98E-06 | 0.003 |
|                      |       |          |       | hsa-let-7d-star | -3.73 | 0.00E+00 | 0.000 |
|                      |       |          |       | hsa-miR-671-3p  | -4.48 | 0.00E+00 | 0.000 |



Supplementary Table 3. Clinical and demographic data on patients and healthy controls included in the blood and cultured peripheral blood mononuclear cell miRNA microarray experiments.

|                                                    | Blood samples                |                               | Cultured PBMCs   |                          |
|----------------------------------------------------|------------------------------|-------------------------------|------------------|--------------------------|
|                                                    | Patients<br>(n=24)           | Healthy<br>Controls<br>(n=24) | Patient<br>(n=1) | Healthy Control<br>(n=1) |
| Age, years (mean $\pm$ sd)<br>(range)              | 40.21 $\pm$ 10.13<br>(23-66) | 39.96 $\pm$ 10.67<br>(23-66)  | 40               | 29                       |
| Gender                                             |                              |                               |                  |                          |
| Females                                            | 14 (58%)                     | 14 (58%)                      | 1                | 1                        |
| Males                                              | 10 (42%)                     | 10 (42%)                      | -                | -                        |
| EDSS (mean $\pm$ sd)<br>(range)                    | 2.69 $\pm$ 1.94 (0-<br>7.5)  | -                             | 2.5              | -                        |
| AOO, years (mean $\pm$<br>sd) (range)              | 30.63 $\pm$ 10.73<br>(11-65) | -                             | 21               | -                        |
| Disease duration, years<br>(mean $\pm$ sd) (range) | 9.58 $\pm$ 8.05<br>(1-33)    | -                             | 19               | -                        |

Abbreviations. EDSS: expanded disability status scale; AOO: age of onset; sd: standard deviation.
